# Supplementary material
Source: Springer Nature journal article supplement (https://www.springermedizin.de/resource/supplementary/13000_2011_523_MOESM4_ESM.pdf/9624898)
Supplement: MOESM4 [file 9624898]

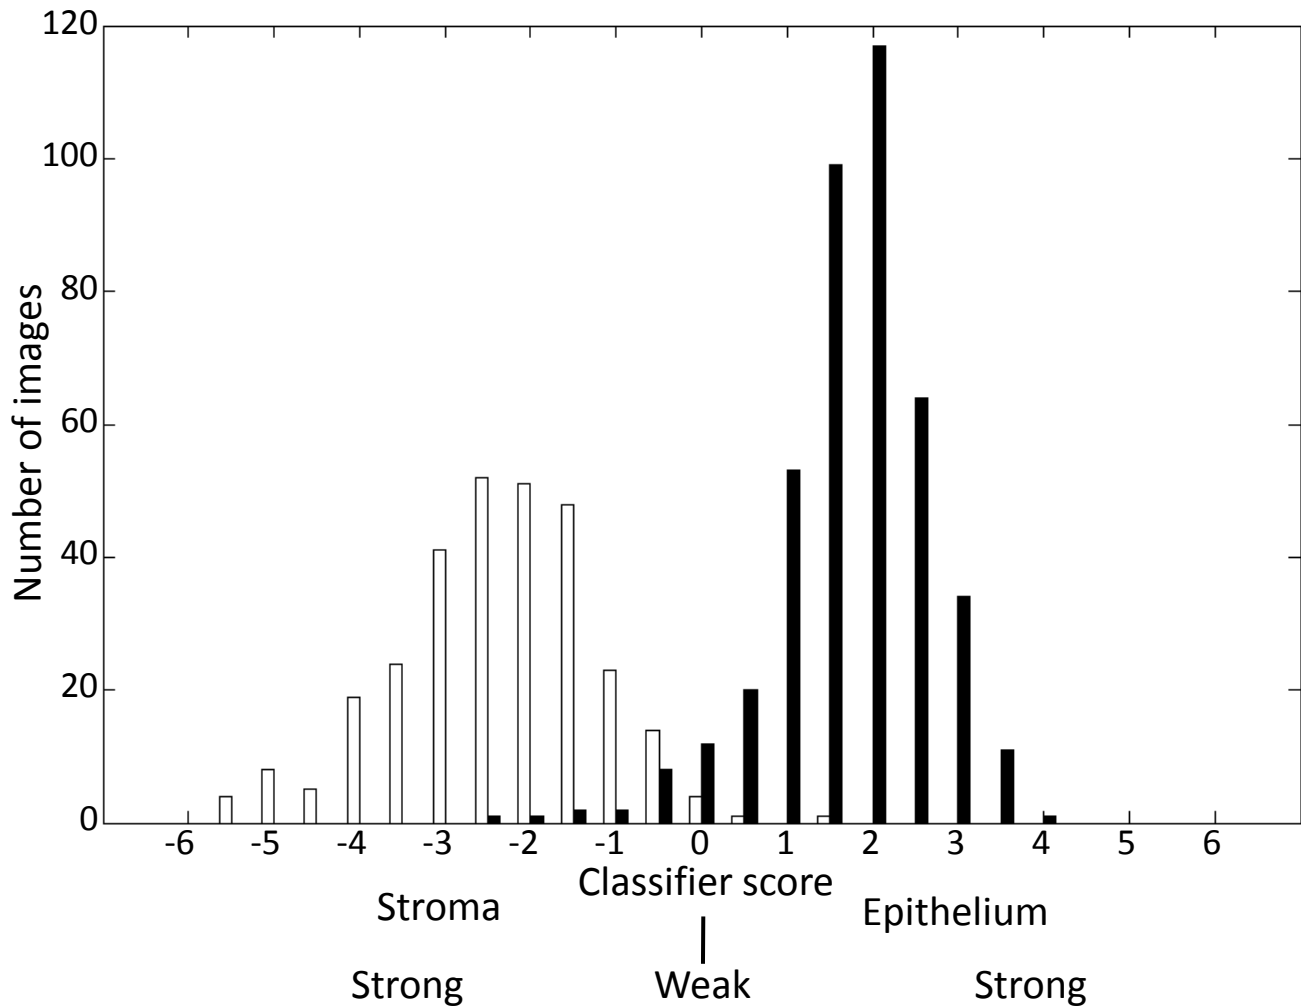

|              |            | LBP/C Classifier |             |                 |                   |     |
|--------------|------------|------------------|-------------|-----------------|-------------------|-----|
|              |            | Stroma strong    | Stroma weak | Epithelium weak | Epithelium strong |     |
| Ground truth | Stroma     | 263              | 28          | 3               | 1                 | 295 |
|              | Epithelium | 4                | 15          | 42              | 364               | 425 |
|              |            | 267              | 43          | 45              | 365               | 720 |
